# Supplementary material for: Calorie Restriction and Time-Restricted Feeding: Effective Interventions in Overweight or Obese Patients Undergoing Radiotherapy Treatment with Curative Intent for Cancer
Source: MDPI journal article supplement (doi:10.3390/nu16040477), 2024-02-07
Supplement: s1 [file s1]

## 24-hour Reminder Survey

**Name of patient:** \_\_\_\_\_

**Age**\_\_\_\_\_ **Sex:** \_\_\_\_\_ **Weight:**\_\_\_\_\_ **Height:**\_\_\_\_\_ **BMI:**\_\_\_\_\_

**Physical Activity:** \_\_\_\_\_ **Frequency of Physical Activity:** \_\_\_\_\_

[illegible]
